# Supplementary material for: White Matter Correlates of Theory of Mind in Patients With First-Episode Psychosis
Source: Frontiers journal article supplement (doi:10.3389/fpsyt.2021.617683), 2021-03-05
Supplement: Data_Sheet_1.PDF [file Data_Sheet_1.PDF]

# White matter correlates of theory of mind in patients with first-episode psychosis

## *Supplemental Materials*

**Table S1.** Correlation results of GAF and HAM-D with RoIs and ToM task scores in FEP

|       |                     | Left SLF | Left Cingulum | Strange Story score |
|-------|---------------------|----------|---------------|---------------------|
| GAF   | Pearson Correlation | .239     | -.003         | -.033               |
|       | Sig.                | .168     | .988          | .849                |
| HAM-D | Pearson Correlation | -.239    | -.215         | .184                |
|       | Sig.                | .167     | .214          | .289                |

Neither GAF nor HAM-D were correlated with the RoIs or strange story task scores, suggesting that the clinical scores are unlikely the confounding factors in this study.

**Table S2.** Correlation analysis results between antipsychotics and white matters in FEP

|                 |                     | Left SLF | Left Cingulum |
|-----------------|---------------------|----------|---------------|
| Antipsychotics* | Pearson Correlation | -.079    | -.174         |
|                 | Sig.                | .652     | .318          |

\*All antipsychotics were converted into olanzapine-equivalent dose (Leucht et al., 2015)

**Table S3.** Partial correlation analysis results (control variable: antipsychotics) in FEP

|                     |                     | Left SLF | Left Cingulum |
|---------------------|---------------------|----------|---------------|
| Strange story score | Pearson Correlation | .343     | .342          |
|                     | Sig.                | .047     | .048          |

Antipsychotics are not correlated with the left cingulum and left SLF (Table S2). Also, the correlation between the white matter RoIs and the high order ToM (strange story tasks) were maintained in significant level even after controlling the effect of antipsychotics (Table S3). These results suggest that the antipsychotics effect is not significant in the results of this study.

**Table S4.** Correlation analysis results between age and white matter RoIs in FEP

|     |                     | Left SLF | Left Cingulum |
|-----|---------------------|----------|---------------|
| Age | Pearson Correlation | -.063    | .237          |
|     | Sig.                | .721     | .171          |

**Table S5.** Partial correlation analysis results (control variable: age) in FEP

|                    |                     | Left SLF | Left Cingulum |
|--------------------|---------------------|----------|---------------|
| Strange story task | Pearson Correlation | .378     | .348          |
|                    | Sig.                | .028     | .043          |

The left cingulum and SLF are not correlated with age (Table S4). Also, the correlation between the white matter RoIs and the high order ToM (strange story tasks) were maintained in significant level even after controlling age. These results suggest that the effect of age is not significant in this study.
